# Supplementary material for: Intermittent hypoxia reduces infarct size in rats with acute myocardial infarction: a systematic review and meta-analysis
Source: PubMed Central journal article supplement (PMC7507284; doi:10.1186/s12872-020-01702-y), 2020-09-22
Supplement: 12872_2020_1702_MOESM3_ESM.pdf [file 12872_2020_1702_MOESM3_ESM.pdf]

| Study                 | A 20-point document quality scoring scale |   |   |   |   |   |   |   |   |    |    |    |    |    |    |    |    |    |    |    | A 9-point document quality scoring scale |   |   |   |   |   |   |   |   |   |
|-----------------------|-------------------------------------------|---|---|---|---|---|---|---|---|----|----|----|----|----|----|----|----|----|----|----|------------------------------------------|---|---|---|---|---|---|---|---|---|
|                       | 1                                         | 2 | 3 | 4 | 5 | 6 | 7 | 8 | 9 | 10 | 11 | 12 | 13 | 14 | 15 | 16 | 17 | 18 | 19 | 20 | 1                                        | 2 | 3 | 4 | 5 | 6 | 7 | 8 | 9 |   |
| Yuan 2017(4)          | +                                         | + | + | + | + | - | - | + | - | +  | -  | +  | +  | +  | +  | +  | -  | -  | +  | +  | +                                        | + | + | + | - | + | - | - | + | + |
| Li 2016(25)           | +                                         | + | + | + | + | - | - | + | - | +  | -  | +  | -  | +  | +  | +  | -  | -  | +  | +  | +                                        | + | + | + | + | + | - | - | - | + |
| Kasparova 2015(3)     | +                                         | + | + | + | + | - | + | + | - | +  | -  | +  | +  | +  | +  | +  | -  | -  | +  | +  | +                                        | + | + | + | + | + | - | - | + | + |
| Meng 2014(26)         | +                                         | + | + | + | + | - | - | + | - | +  | -  | +  | -  | -  | +  | +  | -  | -  | +  | +  | +                                        | + | + | + | + | + | - | - | - | - |
| Ma 2014(27)           | +                                         | + | + | + | + | - | - | + | - | +  | -  | +  | -  | -  | +  | +  | -  | -  | +  | +  | +                                        | + | + | + | + | - | + | - | - | - |
| Gao 2014(28)          | +                                         | + | + | + | + | - | - | + | - | +  | -  | +  | -  | -  | +  | +  | -  | +  | +  | +  | +                                        | + | + | + | + | + | - | - | - | + |
| Manukhina 2013(29)    | +                                         | + | + | + | + | - | - | + | - | +  | -  | +  | +  | +  | +  | +  | -  | -  | +  | +  | +                                        | + | + | + | + | - | + | + | + | + |
| Ramond 2013(17)       | +                                         | + | + | + | + | + | - | + | - | +  | +  | +  | +  | +  | +  | +  | -  | -  | +  | +  | +                                        | + | + | + | + | - | + | - | - | + |
| Milano 2011(18)       | +                                         | + | + | + | + | - | - | + | - | +  | -  | +  | +  | +  | +  | +  | +  | -  | +  | +  | +                                        | + | + | + | + | - | + | - | - | + |
| Wang 2011(30)         | +                                         | + | + | + | + | - | - | + | - | +  | -  | +  | +  | +  | +  | +  | -  | -  | +  | +  | +                                        | + | + | + | + | - | + | - | - | + |
| Belaidi 2008(31)      | +                                         | + | + | + | + | + | + | + | + | +  | +  | +  | +  | -  | +  | +  | +  | -  | +  | +  | +                                        | + | + | + | + | + | - | - | + | - |
| Yeung 2007(32)        | +                                         | + | + | + | + | - | + | + | - | +  | -  | +  | -  | +  | +  | +  | -  | -  | +  | +  | +                                        | + | + | + | + | + | - | - | - | - |
| Ravingerová 2007(33)  | +                                         | + | + | + | + | - | - | + | - | +  | -  | +  | +  | +  | +  | +  | -  | -  | +  | +  | +                                        | + | + | + | + | + | - | - | + | - |
| Kolár 2007(34)        | +                                         | + | + | + | + | - | - | + | - | +  | -  | +  | +  | +  | +  | +  | -  | +  | +  | +  | +                                        | + | + | + | + | - | + | - | - | + |
| Béguin 2007(35)       | +                                         | + | + | + | + | + | - | + | + | +  | +  | +  | +  | -  | +  | +  | -  | +  | +  | +  | +                                        | + | + | + | + | + | - | - | + | - |
| Zhu 2006(36)          | +                                         | - | + | + | - | - | - | + | - | +  | -  | +  | +  | -  | +  | +  | -  | -  | +  | +  | +                                        | - | + | + | + | - | + | + | - | + |
| Kolár 2005(37)        | +                                         | + | + | + | - | - | - | + | - | +  | -  | +  | +  | -  | +  | +  | -  | -  | +  | +  | +                                        | - | + | - | + | - | + | - | - | + |
| Béguin 2005(38)       | +                                         | + | + | + | + | + | + | + | + | +  | +  | +  | +  | -  | +  | +  | +  | +  | +  | +  | +                                        | + | + | + | + | + | + | - | - | + |
| Joyeux-Faure 2005(39) | +                                         | + | + | + | + | - | - | + | + | +  | -  | +  | +  | +  | +  | +  | -  | -  | +  | +  | +                                        | + | + | + | + | + | - | - | + | - |
| Neckár 2005(40)       | +                                         | + | + | + | + | - | - | + | - | +  | -  | +  | +  | +  | +  | +  | +  | +  | +  | +  | +                                        | + | + | + | + | - | + | - | - | + |
| Neckár 2004(41)       | -                                         | + | + | + | + | - | - | + | - | +  | -  | +  | +  | +  | +  | +  | -  | -  | +  | +  | +                                        | + | + | + | + | - | + | - | - | + |
| Neckár 2002(42)       | +                                         | + | + | + | + | - | - | + | - | +  | -  | +  | -  | +  | +  | +  | -  | -  | +  | +  | +                                        | + | + | + | + | - | + | - | - | - |
| Neckár 2002(43)       | -                                         | + | + | + | + | - | - | + | - | +  | -  | +  | +  | +  | +  | +  | -  | +  | +  | +  | +                                        | + | + | + | + | - | + | - | - | + |
